# Supplementary material for: The Dimensions of Individual Support for Coastal Hazard Mitigation: Analysis of a Survey of Upper Texas Coast Residents
Source: Atypon-hosted journal article supplement (doi:10.1061/(asce)nh.1527-6996.0000544), 2022-02-03
Supplement: supplemental_material_nh.1527-6996.0000544_ross.pdf [file supplemental_material_nh.1527-6996.0000544_ross.pdf]

## SUPPLEMENTAL MATERIALS

*ASCE Natural Hazards Review*

# The Dimensions of Individual Support for Coastal Hazard Mitigation: Analysis of a Survey of Upper Texas Coast Residents

Ashley D. Ross and Kayode O. Atoba

**DOI:** 10.1061/(ASCE)NH.1527-6996.0000544

© ASCE 2022

[www.ascelibrary.org](http://www.ascelibrary.org)

1 **Appendix S1: Survey Weight**

2 The phone survey data were weighted to approximate the most recently available population estimates  
 3 from the U.S. Census Bureau. For these data, estimates from the 2016 American Community Survey for  
 4 the adult population (18 years and over) in Harris, Galveston, and Chambers Counties were used. The  
 5 sample weight is calculated by taking the inverse of the probability that an individual respondent would  
 6 have been selected in the final sample. This weight is based on the population of the county divided by  
 7 observed sample within the county. In addition, the weight is “raked” iteratively to adjust sample  
 8 estimates to population estimates on education, race, and age. Additionally, a weight to apply to the  
 9 merged phone and online survey data was created using accepted techniques for combining probability  
 10 and nonprobability samples (Mercer et al. 2017). First, the probability (phone) and non-probability  
 11 (online) samples were merged into the same data file. Second, a logistic regression predicting  
 12 membership in the non-probability sample was conducted. Third, the inverse of the probability was used  
 13 to create initial weights for the non-probability sample. Fourth, the data was “raked” to match population  
 14 estimates for each county. The comparison of the unweighted and the weighted samples are shown in  
 15 Table S1.

16

17 **Table S1. Comparison of Unweighted and Weighted Sample Estimates**

|                             | <b>Population</b> | <b>Phone Sample</b> |          | <b>Online Sample</b> |          | <b>Combined Sample</b> |          |
|-----------------------------|-------------------|---------------------|----------|----------------------|----------|------------------------|----------|
|                             | (2016 ACS)        | Unweighted          | Weighted | Unweighted           | Weighted | Unweighted             | Weighted |
| <b>AGE</b>                  |                   |                     |          |                      |          |                        |          |
| <i>18 to 24 years</i>       | 13.3%             | 9.9%                | 13.3%    | 15.0%                | 13.3%    | 13.7%                  | 13.3%    |
| <i>25 to 34 years</i>       | 21.9%             | 15.2%               | 21.9%    | 29.2%                | 21.9%    | 26.2%                  | 21.9%    |
| <i>35 to 44 years</i>       | 19.5%             | 14.9%               | 19.5%    | 18.8%                | 19.5%    | 17.8%                  | 19.5%    |
| <i>45 to 54 years</i>       | 17.6%             | 17.4%               | 17.6%    | 13.7%                | 17.6%    | 14.3%                  | 17.6%    |
| <i>55 to 65 years</i>       | 14.7%             | 20.9%               | 14.7%    | 12.1%                | 14.7%    | 14.3%                  | 14.7%    |
| <i>65 years &amp; older</i> | 13.0%             | 21.7%               | 13.0%    | 11.2%                | 13.0%    | 13.7%                  | 13.0%    |
| <b>RACE &amp; ETHNICITY</b> |                   |                     |          |                      |          |                        |          |

|                            |       |       |       |       |       |       |       |
|----------------------------|-------|-------|-------|-------|-------|-------|-------|
| <i>White, non-Hispanic</i> | 33.3% | 66.7% | 33.1% | 48.3% | 33.1% | 52.5% | 33.1% |
| <i>Hispanic/Latino</i>     | 40.4% | 15.2% | 40.1% | 26.2% | 40.6% | 23.6% | 40.1% |
| <i>African American</i>    | 18.0% | 11.4% | 18.1% | 17.5% | 18.1% | 16.1% | 18.1% |
| <i>Other</i>               | 8.2%  | 6.1%  | 8.3%  | 8.0%  | 8.3%  | 7.7%  | 8.3%  |

**EDUCATION**

|                            |       |       |       |       |       |       |       |
|----------------------------|-------|-------|-------|-------|-------|-------|-------|
| <i>High School or Less</i> | 43.7% | 21.3% | 43.7% | 25.1% | 43.6% | 23.4% | 43.6% |
| <i>Some College</i>        | 29.2% | 33.2% | 29.2% | 37.6% | 29.1% | 36.3% | 29.1% |
| <i>College Degree</i>      | 27.2% | 45.5% | 27.2% | 37.4% | 27.2% | 40.3% | 27.2% |

---

18 Note: Figures may not sum to 100% because of rounding error.

19

20 **References**

21 Mercer, Andrew W., Frauke Kreuter, Scott Keeter, and Elizabeth A. Stuart. (2017). Theory and Practice  
 22 in Nonprobability Surveys: Parallels between Causal Inference and Survey Inference. *Public Opinion*  
 23 *Quarterly*, 81(S1): 250–271. <https://doi.org/10.1093/poq/nfw060>.

24 **Appendix S2. Descriptive Statistics of Independent Variables**

25 Descriptive statistics for the independent variables in the model are given in Table S2.

26 **Table S2. Descriptive Statistics**

| <b>Variable</b>                                    | <b>Obs.</b> | <b>Mean</b> | <b>Std. Dev.</b> | <b>Min</b> | <b>Max</b> |
|----------------------------------------------------|-------------|-------------|------------------|------------|------------|
| <i>Seawalls and levees</i>                         | 2254        | 3.302       | .88              | 1          | 4          |
| <i>Basins</i>                                      | 2206        | 3.175       | .925             | 1          | 4          |
| <i>Sand dunes</i>                                  | 2238        | 3.26        | .913             | 1          | 4          |
| <i>Wetlands</i>                                    | 2254        | 3.35        | .879             | 1          | 4          |
| <i>Elevation</i>                                   | 2268        | 3.452       | .857             | 1          | 4          |
| <i>Zoning</i>                                      | 2234        | 3.021       | .964             | 1          | 4          |
| <i>Buyouts</i>                                     | 2251        | 3.04        | 1.039            | 1          | 4          |
| <i>Risk perception</i>                             | 2202        | 0           | 1                | -2.666     | 1.7        |
| <i>Flood damages</i>                               | 2185        | 2.749       | 3.29             | 0          | 16.842     |
| <i>Hurricane Ike damage</i>                        | 2281        | .363        | .481             | 0          | 1          |
| <i>Hurricane Harvey damage</i>                     | 2281        | 28.772      | 33.102           | 0          | 100        |
| <i>Self-reliance</i>                               | 2254        | .208        | .406             | 0          | 1          |
| <i>State &amp; local government responsibility</i> | 2281        | .338        | .473             | 0          | 1          |
| <i>Homeowner</i>                                   | 2256        | .604        | .489             | 0          | 1          |
| <i>Latino</i>                                      | 2253        | .229        | .42              | 0          | 1          |
| <i>African American</i>                            | 2253        | .17         | .376             | 0          | 1          |
| <i>College educated</i>                            | 2265        | .216        | .412             | 0          | 1          |
| <i>Galveston County</i>                            | 2281        | .256        | .437             | 0          | 1          |
| <i>Chambers County</i>                             | 2281        | .032        | .177             | 0          | 1          |

28 **Appendix S3: Risk Perception Factor Score**

29 Principal component factor analysis was conducted to create a factor score representing the latent variable  
30 of perceived risk. The factor analysis included responses to the survey question: “How likely do you think  
31 it is that in the next 10 years there will be a flood that causes...major damage to property in your city?  
32 deaths and injuries to people in your community? major damage to your home? disruption to your job that  
33 prevents you from working? disruption of electrical, telephone, and other basic services?” Response  
34 options included: “not at all,” “small extent,” “moderate extent,” “great extent,” “very great extent.”  
35 Factor loadings are given in Table S3. Given the Eigenvalues reported, only one factor was retained.  
36

37 **Table S3. Risk Perception Factor Loadings**

| <b>Scale Items</b>                  | <b>Factor 1</b> | <b>Factor 2</b> | <b>Factor 3</b> |
|-------------------------------------|-----------------|-----------------|-----------------|
| <i>major damage to property</i>     | 0.80            |                 |                 |
| <i>death and injuries</i>           | 0.82            |                 |                 |
| <i>major damage to your home</i>    | 0.78            |                 |                 |
| <i>disruption to your job</i>       | 0.72            |                 |                 |
| <i>disruption to basic services</i> | 0.77            |                 |                 |
| Percentage of Variance              | 60.84           | 22.47           | 9.92            |
| Eigenvalue                          | 3.04            | 0.73            | 0.51            |
| Cronbach’s Alpha                    | 0.834           | --              | --              |

39 **Appendix S4. Correlation Matrix of Independent Variables**

40 Pairwise correlations for the independent variables in the model are given in Table S4.

41

42 **Table S4. Pairwise Correlations**

| Variables | (1)     | (2)     | (3)     | (4)     | (5)     | (6)     | (7)     | (8)     | (9)     | (10)   | (11)    | (12)  |
|-----------|---------|---------|---------|---------|---------|---------|---------|---------|---------|--------|---------|-------|
| (1)       | 1.000   |         |         |         |         |         |         |         |         |        |         |       |
| (2)       | 0.064*  | 1.000   |         |         |         |         |         |         |         |        |         |       |
| (3)       | 0.130*  | 0.061*  | 1.000   |         |         |         |         |         |         |        |         |       |
| (4)       | 0.221*  | 0.110*  | 0.156*  | 1.000   |         |         |         |         |         |        |         |       |
| (5)       | -0.129* | -0.030  | -0.056* | 0.003   | 1.000   |         |         |         |         |        |         |       |
| (6)       | -0.094* | -0.009  | 0.016   | -0.048* | 0.061*  | 1.000   |         |         |         |        |         |       |
| (7)       | -0.115* | 0.019   | 0.051*  | -0.079* | 0.103*  | 0.050*  | 1.000   |         |         |        |         |       |
| (8)       | 0.042*  | -0.082* | -0.049* | 0.060*  | -0.006  | -0.048* | -0.093* | 1.000   |         |        |         |       |
| (9)       | 0.037   | -0.135* | 0.008   | 0.076*  | -0.057* | -0.017  | -0.186* | -0.247* | 1.000   |        |         |       |
| (10)      | -0.021  | 0.064*  | 0.054*  | -0.094* | 0.046*  | 0.022   | 0.168*  | -0.143* | -0.054* | 1.000  |         |       |
| (11)      | 0.020   | 0.406*  | 0.051*  | 0.049*  | -0.009  | 0.001   | 0.028   | -0.146* | -0.136* | -0.021 | 1.000   |       |
| (12)      | -0.052* | -0.074* | 0.057*  | 0.063*  | -0.001  | -0.005  | 0.082*  | -0.045* | -0.015  | 0.038  | -0.108* | 1.000 |

43 Notes: Variable labels: (1) risk perceptions; (2) flood damages; (3) Hurricane Ike damage; (4) Hurricane Harvey damage; (5) self-reliance; (6) state & local government  
 44 responsibility; (7) homeowner; (8) Latino; (9) African American; (10) college educated; (11) Galveston County; (12) Chambers County; \* significance at the 0.05 level.

45

46 **Appendix S5. Multinomial Regression Results**

47 **Table S5. Regression Results for Weak Support: Correlates of “support a little” (reference category: “do not support”)**

|                                                    | (1)<br>Seawalls/Levees | (2)<br>Basins       | (3)<br>Sand dunes   | (4)<br>Wetlands   | (5)<br>Elevation  | (6)<br>Zoning       | (7)<br>Buyouts      |
|----------------------------------------------------|------------------------|---------------------|---------------------|-------------------|-------------------|---------------------|---------------------|
| <i>Risk perception</i>                             | -0.004<br>(0.182)      | 0.057<br>(0.167)    | 0.232<br>(0.140)    | 0.210<br>(0.173)  | 0.227<br>(0.191)  | 0.125<br>(0.129)    | 0.073<br>(0.110)    |
| <i>Flood damages</i>                               | -0.007<br>(0.081)      | 0.181**<br>(0.053)  | 0.018<br>(0.054)    | -0.012<br>(0.071) | 0.041<br>(0.055)  | 0.061<br>(0.043)    | 0.039<br>(0.038)    |
| <i>Hurricane Ike damage</i>                        | -0.170<br>(0.311)      | 0.426<br>(0.305)    | -0.104<br>(0.299)   | 0.603<br>(0.317)  | -0.153<br>(0.339) | -0.106<br>(0.243)   | -0.108<br>(0.228)   |
| <i>Hurricane Harvey damage</i>                     | 0.003<br>(0.004)       | -0.002<br>(0.004)   | 0.000<br>(0.004)    | -0.003<br>(0.005) | 0.004<br>(0.006)  | 0.004<br>(0.004)    | 0.002<br>(0.004)    |
| <i>Self-reliance</i>                               | -0.423<br>(0.303)      | -0.649*<br>(0.294)  | -0.313<br>(0.315)   | 0.038<br>(0.324)  | -0.561<br>(0.332) | -0.724**<br>(0.250) | -0.757**<br>(0.232) |
| <i>State &amp; local government responsibility</i> | -0.183<br>(0.307)      | 0.162<br>(0.278)    | -0.126<br>(0.287)   | 0.247<br>(0.313)  | 0.594<br>(0.343)  | -0.115<br>(0.236)   | 0.087<br>(0.224)    |
| <i>Homeowner</i>                                   | 0.987**<br>(0.298)     | 0.102<br>(0.274)    | 0.782**<br>(0.279)  | 0.504<br>(0.294)  | 0.572<br>(0.333)  | 0.585*<br>(0.236)   | 0.360<br>(0.229)    |
| <i>Latino</i>                                      | -0.125<br>(0.316)      | -0.067<br>(0.295)   | -0.252<br>(0.319)   | -0.334<br>(0.341) | -0.158<br>(0.347) | -0.140<br>(0.259)   | 0.074<br>(0.251)    |
| <i>African American</i>                            | -0.465<br>(0.395)      | -0.207<br>(0.331)   | -0.913**<br>(0.346) | -0.304<br>(0.382) | 0.241<br>(0.452)  | -0.368<br>(0.290)   | 0.146<br>(0.292)    |
| <i>College educated</i>                            | 0.025<br>(0.400)       | 0.988*<br>(0.391)   | 0.799<br>(0.453)    | 0.017<br>(0.487)  | -0.599<br>(0.417) | 0.024<br>(0.294)    | 0.132<br>(0.275)    |
| <i>Galveston County</i>                            | -0.369<br>(0.431)      | -0.934**<br>(0.323) | -0.295<br>(0.349)   | -0.501<br>(0.441) | -0.554<br>(0.358) | -0.254<br>(0.307)   | -0.358<br>(0.281)   |
| <i>Chambers County</i>                             | -1.105<br>(0.688)      | -0.513<br>(0.711)   | 1.070<br>(1.132)    | -0.205<br>(1.183) | -0.014<br>(0.796) | -1.755*<br>(0.736)  | -0.970<br>(0.612)   |
| <i>Constant</i>                                    | 0.769*<br>(0.389)      | 0.864**<br>(0.333)  | 0.840*<br>(0.354)   | 0.728<br>(0.383)  | 0.503<br>(0.358)  | 0.638*<br>(0.268)   | 0.158<br>(0.281)    |
| <i>N</i>                                           | 2,040                  | 2,013               | 2,034               | 2,039             | 2,048             | 2,029               | 2,041               |

Notes: Coefficients reported with standard errors in parentheses. \*\* p<0.01, \* p<0.05

48 **Table S6. Regression Results for Moderate Support: Correlates of “support some” (reference category: “do not support”)**

|                                                    | (1)<br>Seawalls/Levees | (2)<br>Basins       | (3)<br>Sand dunes   | (4)<br>Wetlands    | (5)<br>Elevation   | (6)<br>Zoning       | (7)<br>Buyouts      |
|----------------------------------------------------|------------------------|---------------------|---------------------|--------------------|--------------------|---------------------|---------------------|
| <i>Risk perception</i>                             | 0.355*<br>(0.177)      | 0.288<br>(0.156)    | 0.283*<br>(0.129)   | 0.433**<br>(0.162) | 0.477**<br>(0.175) | 0.411**<br>(0.118)  | 0.296**<br>(0.107)  |
| <i>Flood damages</i>                               | 0.022<br>(0.077)       | 0.202**<br>(0.052)  | 0.058<br>(0.049)    | -0.003<br>(0.068)  | 0.067<br>(0.047)   | 0.0802*<br>(0.040)  | 0.045<br>(0.033)    |
| <i>Hurricane Ike damage</i>                        | 0.028<br>(0.283)       | 0.125<br>(0.297)    | -0.215<br>(0.275)   | 0.487<br>(0.294)   | -0.164<br>(0.309)  | -0.400<br>(0.233)   | 0.005<br>(0.210)    |
| <i>Hurricane Harvey damage</i>                     | 0.001<br>(0.004)       | -0.003<br>(0.004)   | -0.001<br>(0.004)   | -0.003<br>(0.004)  | 0.001<br>(0.005)   | -0.001<br>(0.004)   | 0.002<br>(0.003)    |
| <i>Self-reliance</i>                               | -0.582*<br>(0.275)     | -0.624*<br>(0.272)  | -0.374<br>(0.291)   | -0.357<br>(0.299)  | -0.631*<br>(0.294) | -1.078**<br>(0.236) | -1.019**<br>(0.217) |
| <i>State &amp; local government responsibility</i> | 0.263<br>(0.282)       | 0.020<br>(0.262)    | -0.201<br>(0.265)   | 0.281<br>(0.288)   | 0.426<br>(0.308)   | -0.106<br>(0.223)   | 0.196<br>(0.209)    |
| <i>Homeowner</i>                                   | 0.854**<br>(0.273)     | 0.200<br>(0.259)    | 0.688**<br>(0.254)  | 0.817**<br>(0.272) | 0.862**<br>(0.298) | 0.601**<br>(0.218)  | 0.269<br>(0.207)    |
| <i>Latino</i>                                      | -0.375<br>(0.296)      | -0.482<br>(0.280)   | -0.343<br>(0.298)   | -0.669*<br>(0.311) | -0.077<br>(0.301)  | 0.014<br>(0.239)    | -0.024<br>(0.228)   |
| <i>African American</i>                            | -0.542<br>(0.354)      | -0.766*<br>(0.315)  | -1.046**<br>(0.316) | -0.555<br>(0.354)  | -0.381<br>(0.425)  | -0.682*<br>(0.276)  | -0.408<br>(0.276)   |
| <i>College educated</i>                            | 0.174<br>(0.367)       | 0.757*<br>(0.375)   | 0.864*<br>(0.432)   | 0.010<br>(0.472)   | -0.310<br>(0.354)  | -0.259<br>(0.274)   | -0.154<br>(0.254)   |
| <i>Galveston County</i>                            | -0.658<br>(0.406)      | -0.935**<br>(0.315) | -0.103<br>(0.327)   | -0.560<br>(0.413)  | -0.660*<br>(0.323) | -0.133<br>(0.286)   | -0.529*<br>(0.240)  |
| <i>Chambers County</i>                             | -0.950<br>(0.622)      | -0.982<br>(0.716)   | 1.114<br>(0.858)    | 1.112<br>(1.200)   | -0.286<br>(0.840)  | -0.082<br>(0.578)   | -0.124<br>(0.518)   |
| <i>Constant</i>                                    | 1.749**<br>(0.365)     | 1.801**<br>(0.313)  | 1.685**<br>(0.317)  | 1.658**<br>(0.342) | 1.410**<br>(0.307) | 1.483**<br>(0.243)  | 0.983**<br>(0.255)  |
| <i>N</i>                                           | 2,040                  | 2,013               | 2,034               | 2,039              | 2,048              | 2,029               | 2,041               |

Notes: Coefficients reported with standard errors in parentheses. \*\* p<0.01, \* p<0.05



50 **Table S7. Regression Results for Strong Support: Correlates of “support a lot” (reference category: “do not support”)**

|                                                    | (1)<br>Seawalls/Levees | (2)<br>Basins       | (3)<br>Sand dunes    | (4)<br>Wetlands      | (5)<br>Elevation    | (6)<br>Zoning       | (7)<br>Buyouts      |
|----------------------------------------------------|------------------------|---------------------|----------------------|----------------------|---------------------|---------------------|---------------------|
| <i>Risk perception</i>                             | 0.776**<br>(0.176)     | 0.738**<br>(0.158)  | 0.706**<br>(0.128)   | 0.686**<br>(0.164)   | 0.917**<br>(0.172)  | 0.792**<br>(0.123)  | 0.704**<br>(0.104)  |
| <i>Flood damages</i>                               | 0.018<br>(0.076)       | 0.244**<br>(0.051)  | 0.089<br>(0.048)     | 0.019<br>(0.066)     | 0.038<br>(0.046)    | 0.0961*<br>(0.041)  | 0.054<br>(0.033)    |
| <i>Hurricane Ike damage</i>                        | 0.234<br>(0.279)       | 0.208<br>(0.290)    | 0.334<br>(0.269)     | 0.637*<br>(0.284)    | -0.327<br>(0.294)   | -0.235<br>(0.231)   | -0.167<br>(0.204)   |
| <i>Hurricane Harvey damage</i>                     | -0.004<br>(0.004)      | -0.006<br>(0.004)   | -0.00906*<br>(0.004) | -0.00838*<br>(0.004) | -0.003<br>(0.005)   | 0.000<br>(0.004)    | -0.001<br>(0.003)   |
| <i>Self-reliance</i>                               | -0.795**<br>(0.268)    | -0.740**<br>(0.268) | -0.649*<br>(0.289)   | -0.611*<br>(0.293)   | -0.944**<br>(0.272) | -0.936**<br>(0.233) | -1.250**<br>(0.217) |
| <i>State &amp; local government responsibility</i> | 0.160<br>(0.279)       | 0.178<br>(0.261)    | 0.064<br>(0.262)     | 0.310<br>(0.283)     | 0.610*<br>(0.294)   | 0.067<br>(0.224)    | 0.185<br>(0.205)    |
| <i>Homeowner</i>                                   | 1.084**<br>(0.271)     | 0.651*<br>(0.258)   | 1.082**<br>(0.251)   | 0.961**<br>(0.265)   | 0.807**<br>(0.284)  | 0.896**<br>(0.220)  | 0.410*<br>(0.202)   |
| <i>Latino</i>                                      | -0.829**<br>(0.296)    | -0.822**<br>(0.281) | -1.128**<br>(0.299)  | -1.074**<br>(0.308)  | -0.309<br>(0.284)   | -0.683**<br>(0.247) | -0.468*<br>(0.226)  |
| <i>African American</i>                            | -0.391<br>(0.345)      | -0.604*<br>(0.304)  | -1.391**<br>(0.317)  | -1.225**<br>(0.349)  | -0.171<br>(0.408)   | -0.886**<br>(0.272) | -0.135<br>(0.259)   |
| <i>College educated</i>                            | 0.225<br>(0.368)       | 1.098**<br>(0.370)  | 1.243**<br>(0.420)   | 0.807<br>(0.462)     | -0.230<br>(0.342)   | 0.203<br>(0.274)    | -0.062<br>(0.248)   |
| <i>Galveston County</i>                            | 0.252<br>(0.402)       | -1.097**<br>(0.311) | 0.284<br>(0.335)     | -0.201<br>(0.406)    | -0.332<br>(0.309)   | -0.513<br>(0.286)   | -0.383<br>(0.236)   |
| <i>Chambers County</i>                             | -0.427<br>(0.632)      | -0.121<br>(0.699)   | 2.517**<br>(0.870)   | 1.459<br>(1.154)     | 0.521<br>(0.758)    | -0.483<br>(0.592)   | -0.269<br>(0.452)   |
| <i>Constant</i>                                    | 2.219**<br>(0.365)     | 1.915**<br>(0.313)  | 2.032**<br>(0.316)   | 2.420**<br>(0.337)   | 2.821**<br>(0.284)  | 1.423**<br>(0.249)  | 1.554**<br>(0.252)  |
| <i>N</i>                                           | 2,040                  | 2,013               | 2,034                | 2,039                | 2,048               | 2,029               | 2,041               |

Notes: Coefficients reported with standard errors in parentheses. \*\* p<0.01, \* p<0.05
